# Supplementary material
Source: MDPI journal article supplement (https://www.mdpi.com/2311-7524/7/11/481)
Supplement: s1 [file s1]

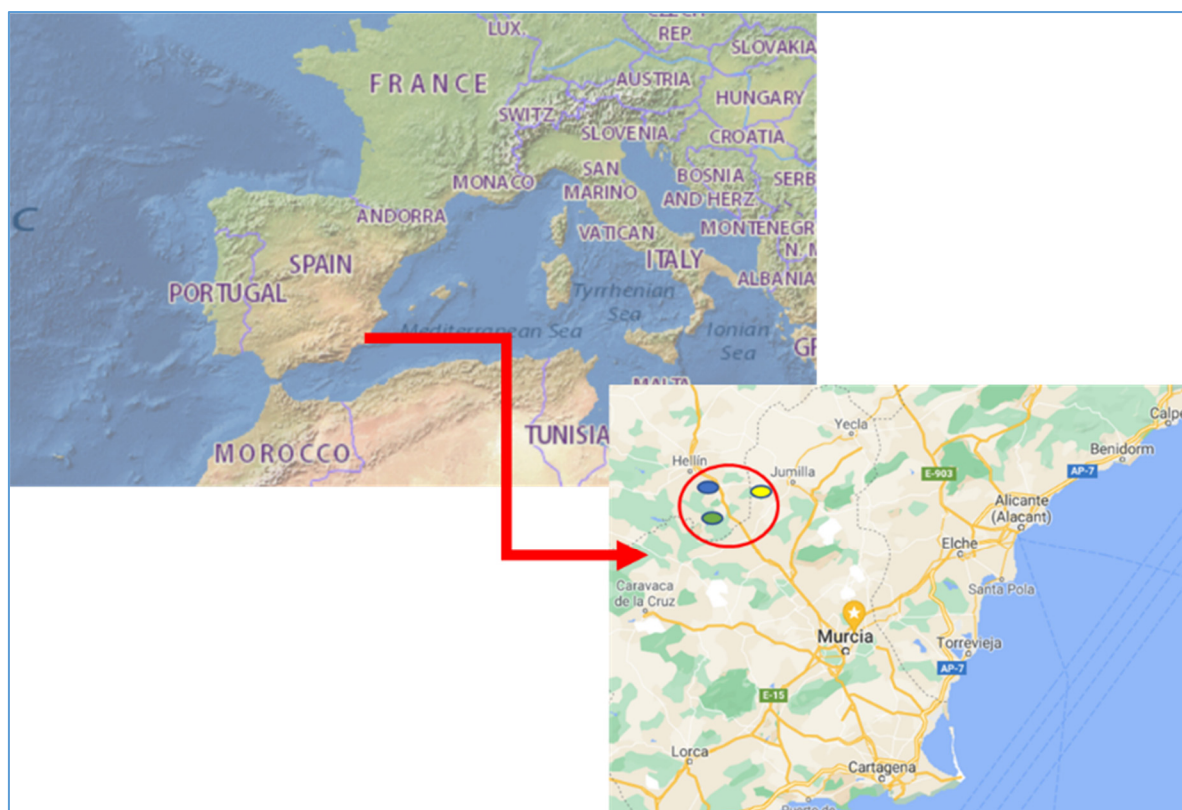

**Figure S1.** Geographical localization of the almond orchards: the blue area indicates the Ferraduel orchard, while green and yellow areas indicate Ferragenes and Garrigues orchards, respectively.

**Table S1.** Nutrient requirements for almonds trees according to yield production.

|            | Yield Production of 1000 kg/ha | Yield Production of 4000 kg/ha |
|------------|--------------------------------|--------------------------------|
| Nitrogen   | 30                             | 90                             |
| Phosphorus | 20                             | 50                             |
| Potassium  | 40                             | 100                            |
| Magnesium  | 20                             | 50                             |

**Table S2.** Fertilizers application dates via fertigation in almond orchards.

| Date              | Fertilizer (Content)                                 |
|-------------------|------------------------------------------------------|
| January: 1st half | Phosphoric acid (54% P <sub>2</sub> O <sub>5</sub> ) |
| January: 2nd half | Nitrogenous solution (32% N)                         |
| February          | Potassium nitrate (13-0-46)                          |
| March: 1st half   | Potassium nitrate (13-0-46)                          |
| March: 2nd half   | Ammonium nitrate (33.5% N)                           |
| April             | Ammonium nitrate (33.5% N)                           |
| May               | Potassium nitrate (13-0-46)                          |
| June              | Ammonium nitrate (33.5% N)                           |
| July              | Potassium nitrate (13-0-46)                          |
| August            | Ammonium nitrate (33.5% N)                           |
| September         | Nitrogenous solution (32% N)                         |
| October: 1st half | Potassium nitrate (13-0-46)                          |
| October: 2nd half | Nitrogenous solution (32% N)                         |
| November          | Phosphoric acid (54% P <sub>2</sub> O <sub>5</sub> ) |
| December          | Phosphoric acid (54% P <sub>2</sub> O <sub>5</sub> ) |
